# Supplementary material for: Molecular origin of efficient hole transfer from non-fullerene acceptors: insights from first-principles calculations
Source: Royal Society of Chemistry journal article supplement (doi:10.1039/c9tc03563j), 2019-01-01
Supplement: c9tc03563j1.pdf [file c9tc03563j1.pdf]

## Supporting Information

### Molecular Origin of Efficient Hole Transfer from Non-Fullerene Acceptors: Insights from First-Principles Calculations

Leandro Benatto <sup>a</sup>, Cleber F. N. Marchiori <sup>b,c</sup>, C. Moyses Araujo <sup>c</sup> and Marlus Koehler <sup>a</sup>

<sup>a</sup>Departamento de Física, Universidade Federal do Paraná, C.P 19044, 81531-980,  
Curitiba-PR, Brazil

<sup>b</sup>Department of Chemistry – Ångström Laboratory, Uppsala University,  
Lägerhyddsvägen 1, Box 538, 751 21 Uppsala, Sweden

<sup>c</sup>Department of Physics and Astronomy, Uppsala University, Ångströmlaboratoriet,  
Lägerhyddsvägen 1, Box 516, 751 20 Uppsala, Sweden

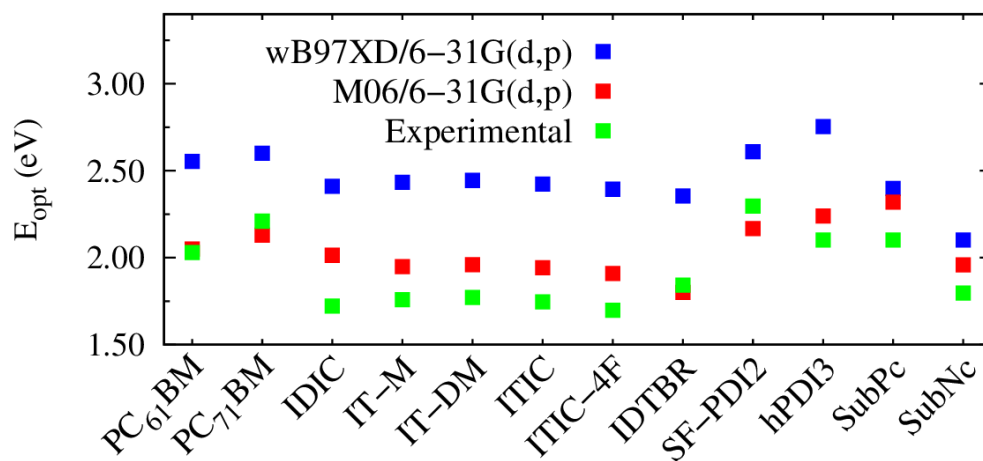

**Figure S1** - Optical gap for non-fullerene molecules. Theoretical results of TD-DFT calculation with PCM and experimental results determined from the first maximum absorption wavelength ( $\lambda_{\text{max}}$ ) in thin film (extracted in accordance with references of Table 2).

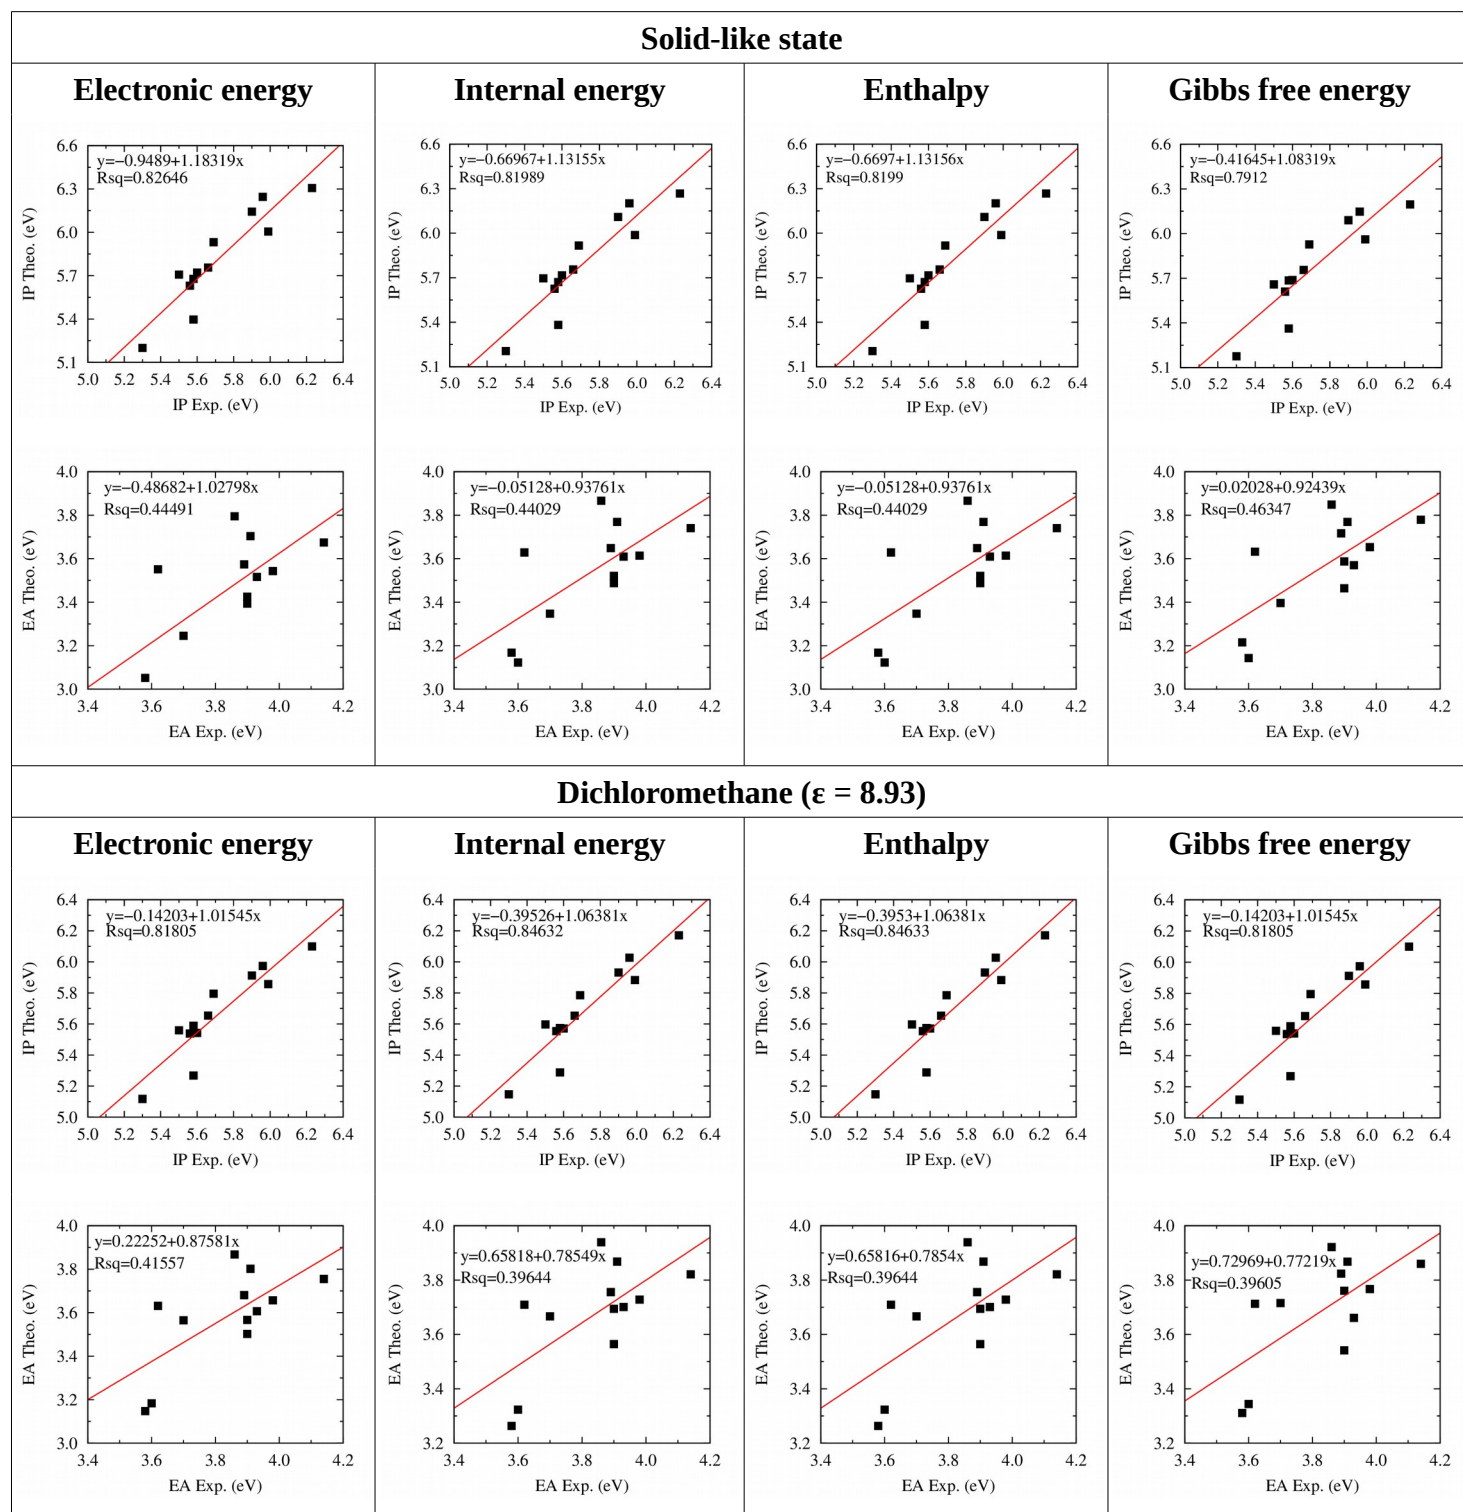

**Figure S2** - Correlation between theoretical and experimental results of *IP* and *EA*. The linear equation and the squared correlation coefficient (*Rsq*) are displayed in detail. Results for solid-like state (with PCM parameters of Table 1) and for molecules in dichloromethane solvent ( $\epsilon = 8.93$ )<sup>1</sup>. We use the M06/6-311G(d,p) theory level for all these procedure.

**Table S1** - Squared correlation coefficient (Rs<sub>q</sub>) of Figure S2.

| Rs <sub>q</sub>  |                   |                 |          |                   |                   |                 |          |                   |
|------------------|-------------------|-----------------|----------|-------------------|-------------------|-----------------|----------|-------------------|
| Solid-like state |                   |                 |          |                   | Dichloromethane   |                 |          |                   |
|                  | Electronic energy | Internal energy | Enthalpy | Gibbs free energy | Electronic energy | Internal energy | Enthalpy | Gibbs free energy |
| <i>IP</i>        | 0.82646           | 0.81989         | 0.8199   | 0.7912            | 0.81805           | 0.84632         | 0.84633  | 0.81805           |
| <i>EA</i>        | 0.44491           | 0.44029         | 0.44029  | 0.46347           | 0.41557           | 0.39644         | 0.39644  | 0.39605           |

**Table S2** - Theoretical results - in gas phase - of  $IP$ ,  $EA$ ,  $E_{opt}$  and  $E_b$  energies. Molecules in GS geometry. Results in eV.

| Molecules                | $IP$ | $EA$ | $E_{opt}$ | $E_b$ |
|--------------------------|------|------|-----------|-------|
| NFAs                     |      |      |           |       |
| <b>IDIC</b>              | 6.82 | 2.55 | 2.22      | 2.05  |
| <b>IT-M</b>              | 6.35 | 2.44 | 2.10      | 1.81  |
| <b>IT-DM</b>             | 6.31 | 2.39 | 2.11      | 1.81  |
| <b>ITIC</b>              | 6.41 | 2.49 | 2.10      | 1.82  |
| <b>ITIC-4f</b>           | 6.54 | 2.66 | 2.07      | 1.81  |
| <b>IDTBR</b>             | 6.26 | 2.40 | 1.93      | 1.93  |
| <b>SF-PDI2</b>           | 6.75 | 2.50 | 2.27      | 1.98  |
| <b>hPDI3</b>             | 6.96 | 2.82 | 2.31      | 1.84  |
| <b>SubPc</b>             | 6.54 | 1.38 | 2.49      | 2.67  |
| <b>SubNc</b>             | 5.90 | 1.49 | 2.13      | 2.28  |
| FAs                      |      |      |           |       |
| <b>PC<sub>71</sub>BM</b> | 6.79 | 1.96 | 2.14      | 2.69  |
| <b>PC<sub>61</sub>BM</b> | 6.94 | 1.94 | 2.06      | 2.94  |

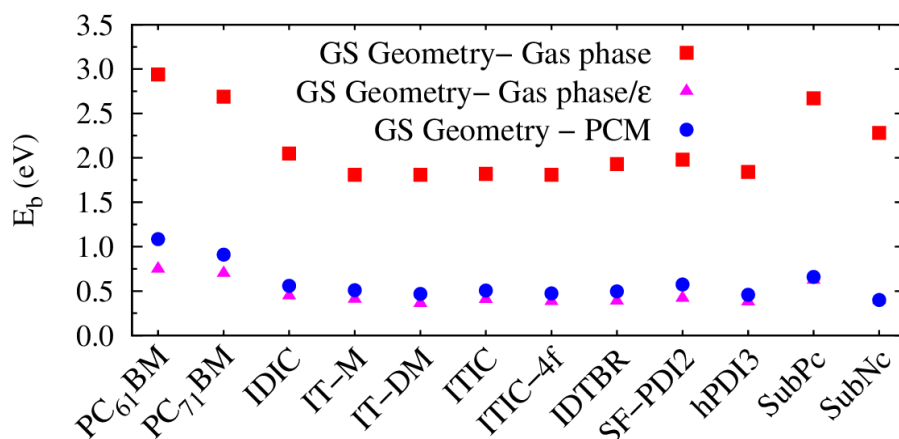

**Figure S3** - Binding energy of Frenkel exciton for FAs and NFAs in ground state (GS) geometry calculated in gas phase and with PCM method. We also present the result in the gas phase divided by the dielectric constant.

**Table S3** - Theoretical results - in solid with PCM - of  $IP$ ,  $EA$  and  $E_{opt}$  energies. Molecules in ES geometry. Results in eV.

| Molecules                | $IP$ | $EA$ | $E_{opt}$ | $E_b$ |
|--------------------------|------|------|-----------|-------|
| NFAs                     |      |      |           |       |
| <b>IDIC</b>              | 5.73 | 3.47 | 1.77      | 0.49  |
| <b>IT-M</b>              | 5.48 | 3.32 | 1.70      | 0.46  |
| <b>IT-DM</b>             | 5.43 | 3.31 | 1.70      | 0.42  |
| <b>ITIC</b>              | 5.50 | 3.35 | 1.69      | 0.46  |
| <b>ITIC-4f</b>           | 5.55 | 3.45 | 1.67      | 0.43  |
| <b>IDTBR</b>             | 5.21 | 3.25 | 1.53      | 0.43  |
| <b>SF-PDI2</b>           | 5.67 | 3.45 | 1.68      | 0.54  |
| <b>hPDI3</b>             | 6.07 | 3.59 | 2.04      | 0.44  |
| <b>SubPc</b>             | 5.51 | 2.74 | 2.15      | 0.62  |
| <b>SubNc</b>             | 4.96 | 2.83 | 1.77      | 0.36  |
| FAs                      |      |      |           |       |
| <b>PC<sub>71</sub>BM</b> | 5.71 | 3.09 | 1.64      | 0.96  |
| <b>PC<sub>61</sub>BM</b> | 5.76 | 3.10 | 1.55      | 1.11  |

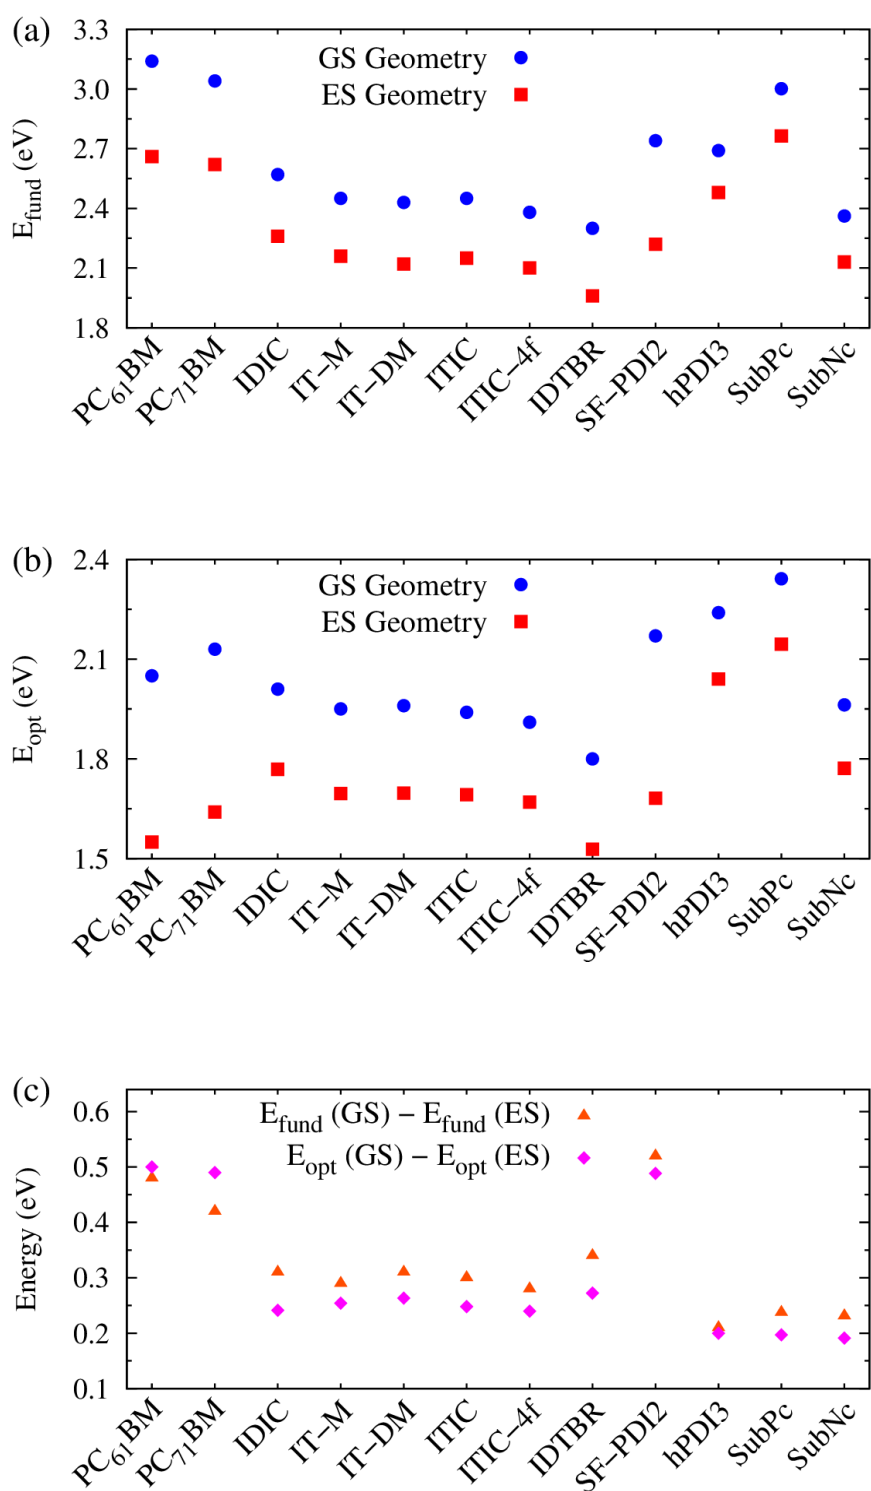

**Figure S4** - Molecular energies for molecules in ground state (GS) geometry and excited state (ES) geometry calculated with PCM method (a) Fundamental gap ( $E_{fund} = IP - EA$ ). (b) Optical gap ( $E_{opt}$ ). (c) Energy difference between  $E_{fund}$  (GS) and  $E_{fund}$  (ES) and between  $E_{opt}$  (GS) and  $E_{opt}$  (ES).

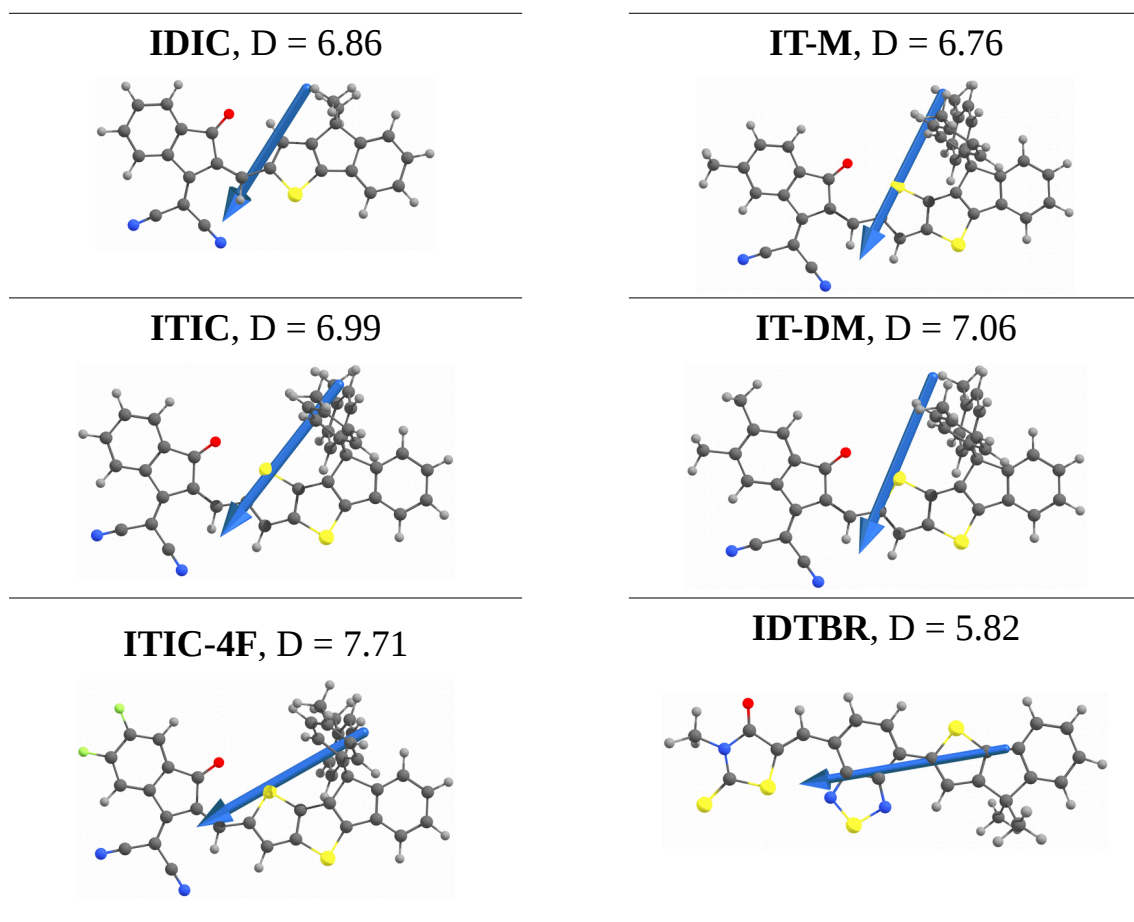

**Figure S5** - Theoretical simulation of the intramolecular electronic dipole moments of half molecule models (dipole in Debyes).

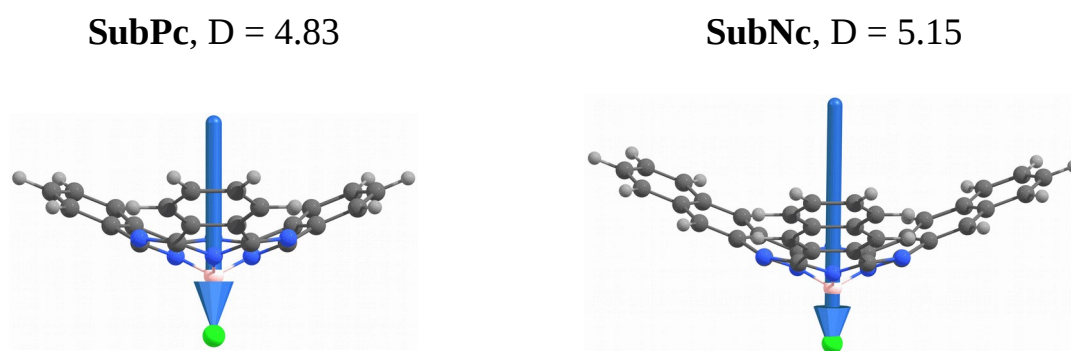

**Figure S6** - Electronic dipole moment of subphthalocyanines (dipole in Debyes).

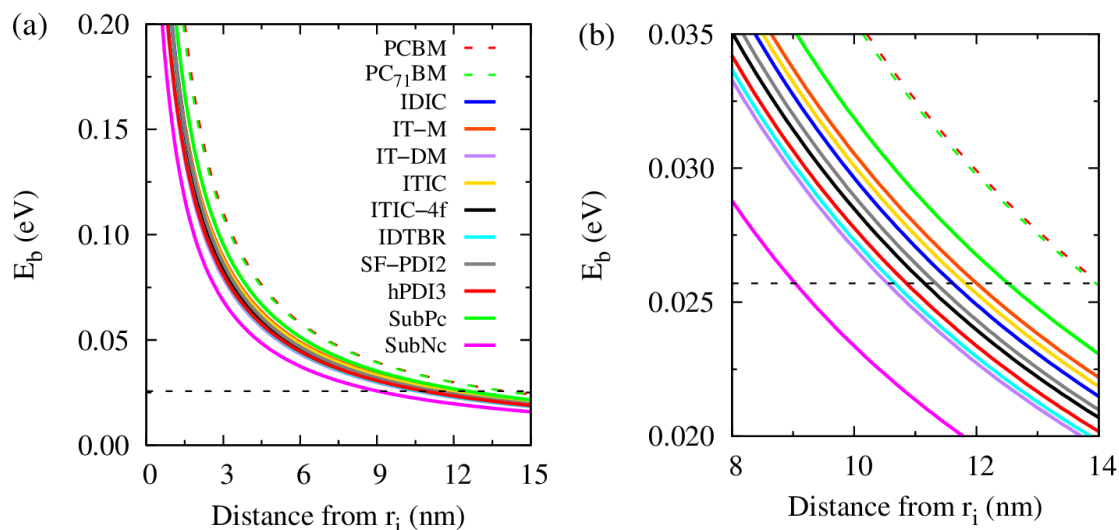

**Figure S7** - (a) Exciton binding energy increasing the distance from  $r_i$ . (b) Zoom-in the region of the exciton binding energy equals  $k_B T$  (dotted black line).

**Table S4** - Theoretical results of initial electron-hole pair distance  $r_i$ , Onsager radius  $r_c$  and the difference between  $r_c - r_i$ . All results in nm obtained from  $E_b(r) = e^2 / 4\pi\epsilon\epsilon_0 r$ .  $r_i$  is the initial electron-hole distance (of the Frenkel exciton) and  $r_c$  is the Coulomb capture radius (or Onsager radius), defined as the distance at which the Coulomb attraction energy equals the thermal energy  $k_B T$ .<sup>2</sup> When  $E_b(r) = k_B T$  it is considered that the electron-hole pair is dissociated.

| Molecules                | $r_i$ | $r_c$ | $r_c - r_i$ |
|--------------------------|-------|-------|-------------|
| NFAs                     |       |       |             |
| <b>IDIC</b>              | 0.56  | 12.18 | 11.62       |
| <b>IT-M</b>              | 0.64  | 12.64 | 12.00       |
| <b>IT-DM</b>             | 0.61  | 11.16 | 10.55       |
| <b>ITIC</b>              | 0.63  | 12.45 | 11.82       |
| <b>ITIC-4F</b>           | 0.64  | 11.79 | 11.15       |
| <b>IDTBR</b>             | 0.58  | 11.25 | 10.67       |
| <b>SF-PDI2</b>           | 0.53  | 11.87 | 11.34       |
| <b>hPDI3</b>             | 0.64  | 11.50 | 10.86       |
| <b>SubPc</b>             | 0.51  | 13.03 | 11.48       |
| <b>SubNc</b>             | 0.62  | 9.66  | 8.96        |
| FAs                      |       |       |             |
| <b>PC<sub>71</sub>BM</b> | 0.41  | 14.36 | 13.95       |
| <b>PC<sub>61</sub>BM</b> | 0.34  | 14.36 | 14.02       |

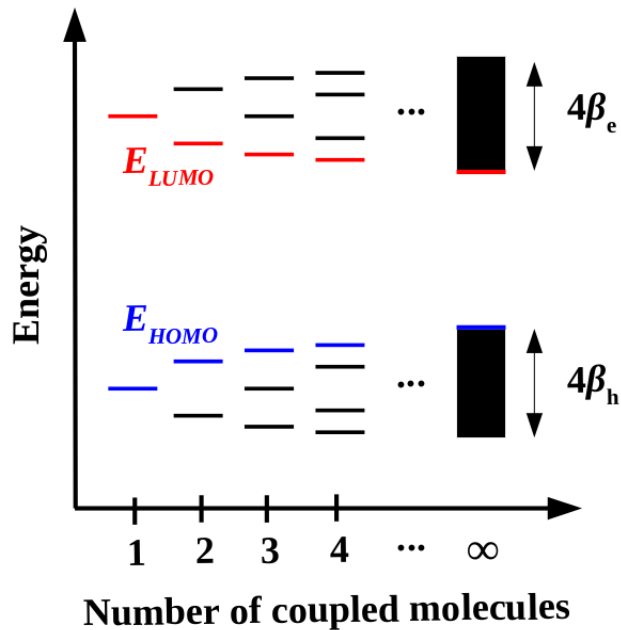

**Figure S8** - Diagram representing the energy band formation and band gap decrease due to the intermolecular electronic coupling as a function of the number molecules.

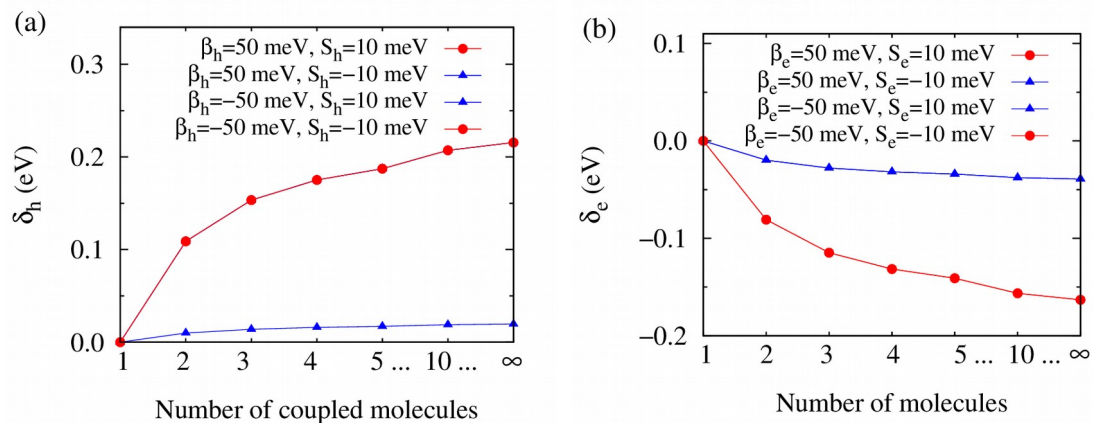

**Figure S9** - (a)  $\delta_h$  and (b)  $\delta_e$  variation as a function of the number of molecules considering  $S_{h/e} = \pm 10$  meV and  $\beta_{h/e} = \pm 50$  meV.

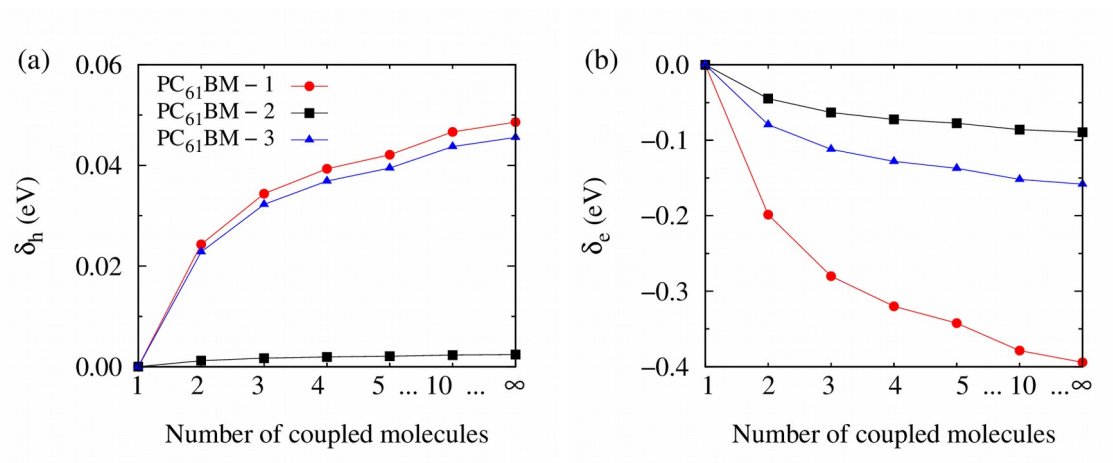

**Figure S10** - (a)  $\delta_h$  and (b)  $\delta_e$  change as a function of the number of coupled molecules considering the results of  $S_{h/e}$  and  $\beta_{h/e}$  of three PC<sub>61</sub>BM dimers.

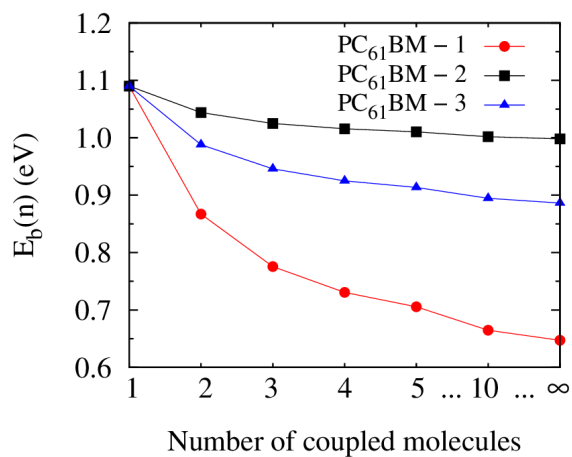

**Figure S11** - Exciton binding energy as a function of the number of coupled molecules for PC<sub>61</sub>BM - 1, PC<sub>61</sub>BM - 2 and PC<sub>61</sub>BM - 3.

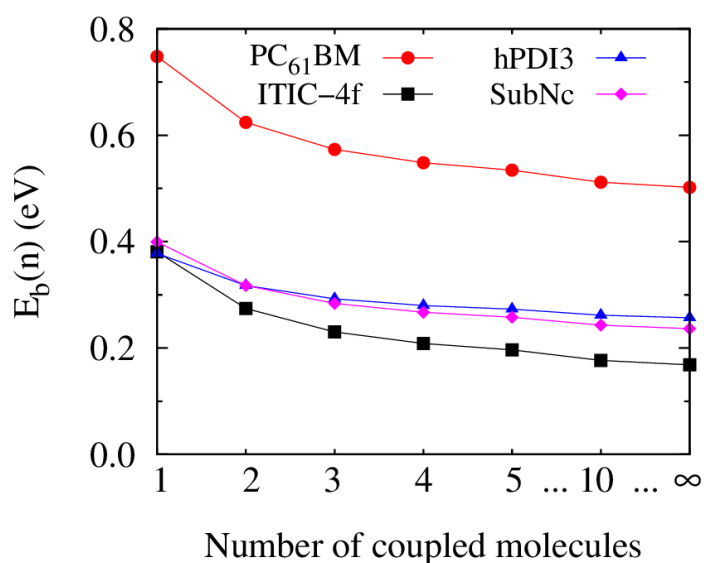

**Figure S12** - Exciton binding energy as a function of the number of molecules. The results of **PC<sub>61</sub>BM** are the average between the simulated dimers.  $E_b(1)$  is the binding energy of Frenkel exciton calculated with  $E_b^{vac}/\epsilon$  method for molecules in GS geometry.

## References

- 1 M. J. Frisch, G. W. Trucks, H. B. Schlegel, G. E. Scuseria, M. A. Robb, J. R. Cheeseman, G. Scalmani, V. Barone, B. Mennucci, G. A. Petersson, H. Nakatsuji, X. Li and M. Caricato, *Gaussian, Inc., Wallingford CT*.
- 2 T. M. Clarke and J. R. Durrant, *Chem. Rev.*, 2010, **110**, 6736–6767.
